# Supplementary material
Source: Springer Nature journal article supplement (https://www.springermedizin.de/resource/supplementary/12939_2006_69_MOESM2_ESM.pdf/9551422)

**Under-5 mortality**

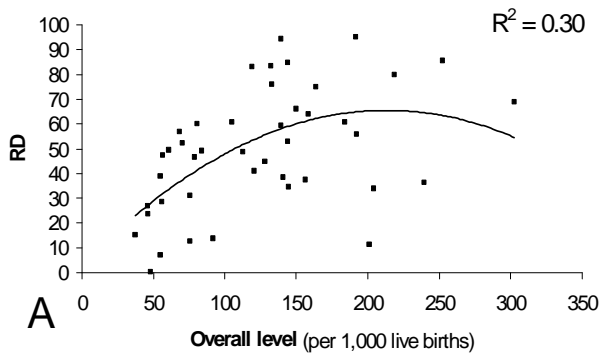

**Immunisation coverage**

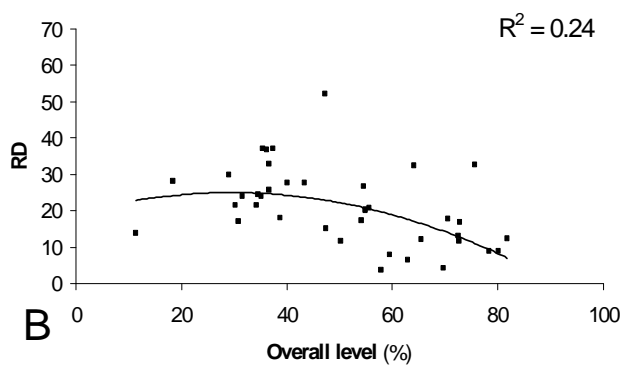

**Skilled delivery attendance**

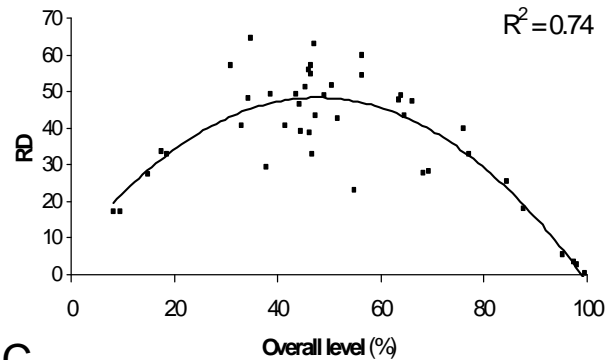

**Antenatal care**

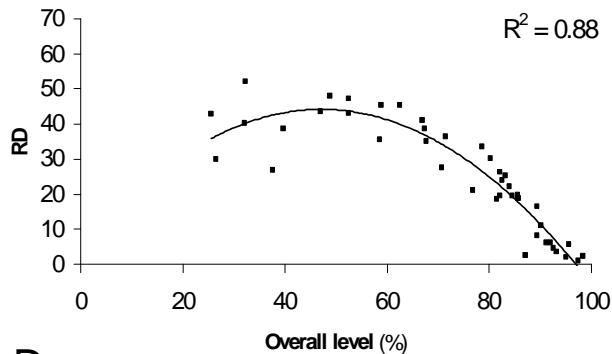

Supplement: MOESM2 [file 9551422]
